# Supplementary material for: Molecular engineering of a commercially available NIR-II fluorescent cyanine dye for improved tumor targeting and imaging
Source: Royal Society of Chemistry journal article supplement (doi:10.1039/d3nj03868h), 2023-01-01
Supplement: d3nj03868h1.pdf [file d3nj03868h1.pdf]

## Supporting Information

# Molecular Engineering of a Commercially Available NIR-II Fluorescent Cyanine Dye for Improved Tumor Targeting and Imaging

Yaxin Liu,<sup>ab</sup> Xiaomei Lu\*,<sup>a</sup> Wen Zhou\*,<sup>b</sup> Quli Fan<sup>b</sup>

<sup>a</sup>Key Laboratory of Flexible Electronics, Institute of Advanced Materials Nanjing Tech University, Nanjing 211816, China

<sup>b</sup>State Key Laboratory of Organic Electronics and Information Displays & Institute of Advanced Materials (IAM), Nanjing University of Posts & Telecommunications, 9 Wenyuan Road, Nanjing, 210023, China

### \*Corresponding authors

Xiaomei Lu ([iamxmlu@njtech.edu.cn](mailto:iamxmlu@njtech.edu.cn)) and Wen Zhou ([iamwzhou@njupt.edu.cn](mailto:iamwzhou@njupt.edu.cn))

## Supporting figures

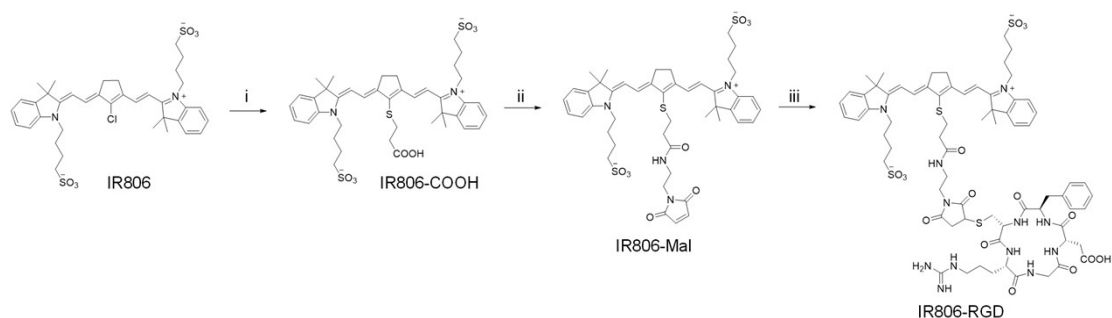

**Scheme S1.** Synthetic route of IR806-RGD. Reagents and conditons: i) mercaptopropionic acid, methanol, trimethylamine, room temperature, 24 h; ii) 1-[Bis(dimethylamino)methylene]-1H-1,2,3-triazolo[4,5-b]pyridinium 3-oxide hexafluorophosphate (HATU), N-Hydroxybenzotriazole, N,N-dimethylformamide (DMF), N,N-diisopropylethylamine (DIPEA), N-(2-Aminoethyl)maleimide, room temperature, 24 h; iii) cRGDyC, PBS (pH 7.4), room temperature, 12 h.

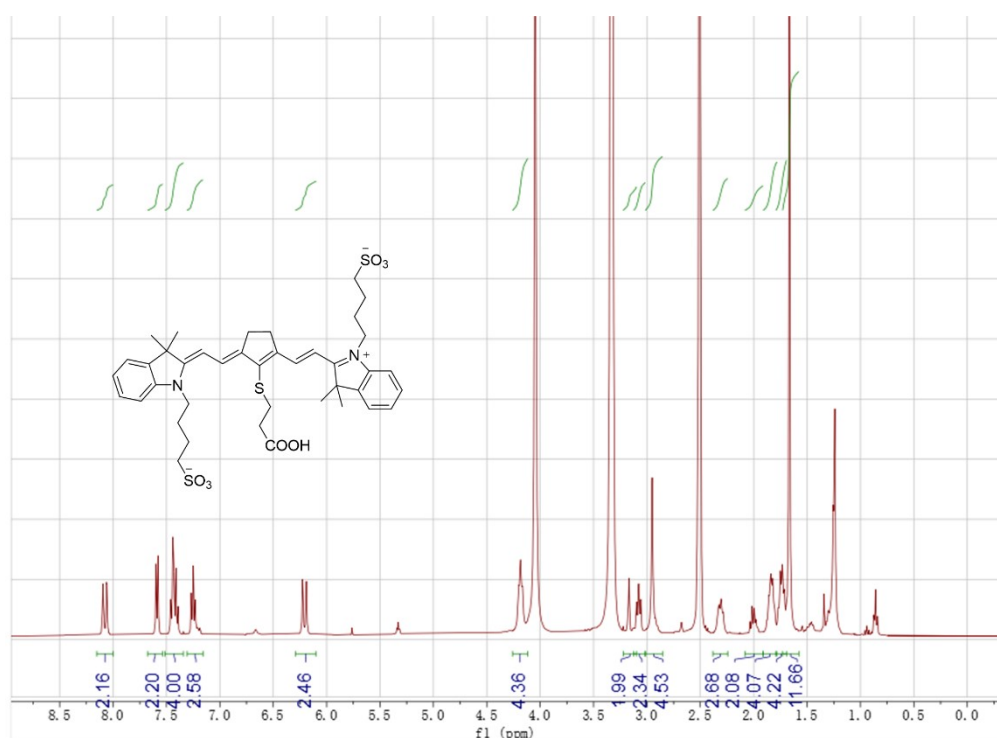

**Figure S1.**  $^1\text{H}$  NMR spectrum of IR806-COOH. DMSO- $d_6$  was used as the solvent.

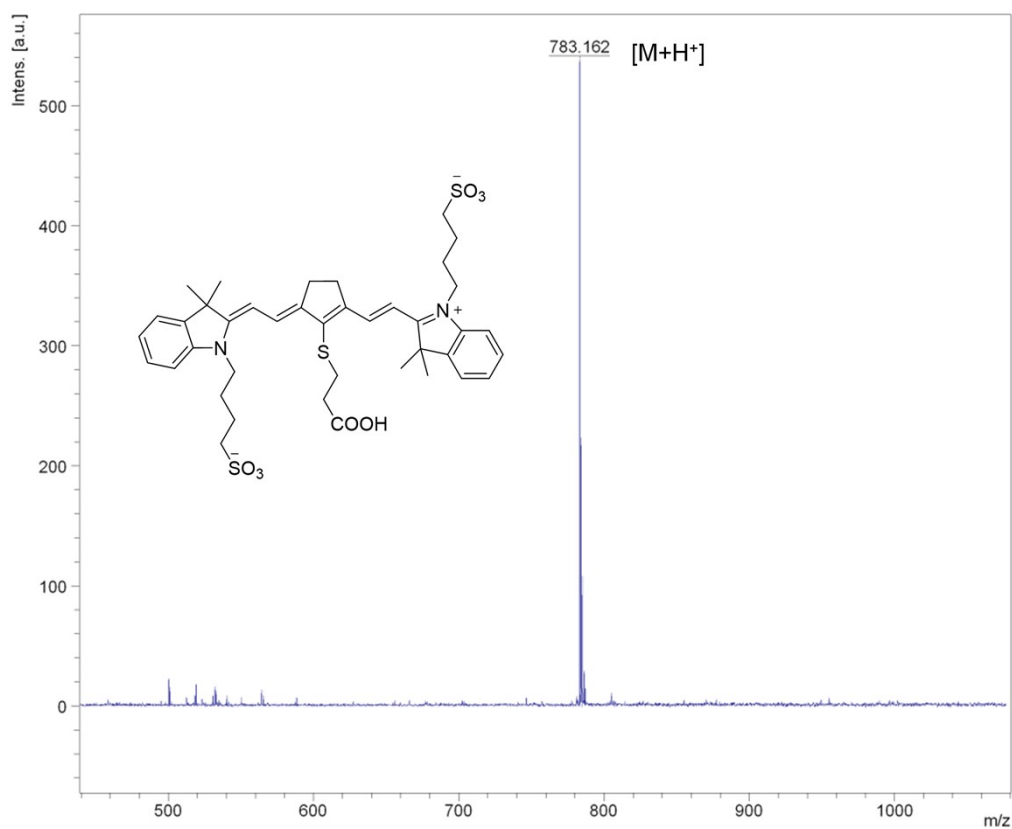

**Figure S2.** MALDI-TOF MS of IR806-COOH.

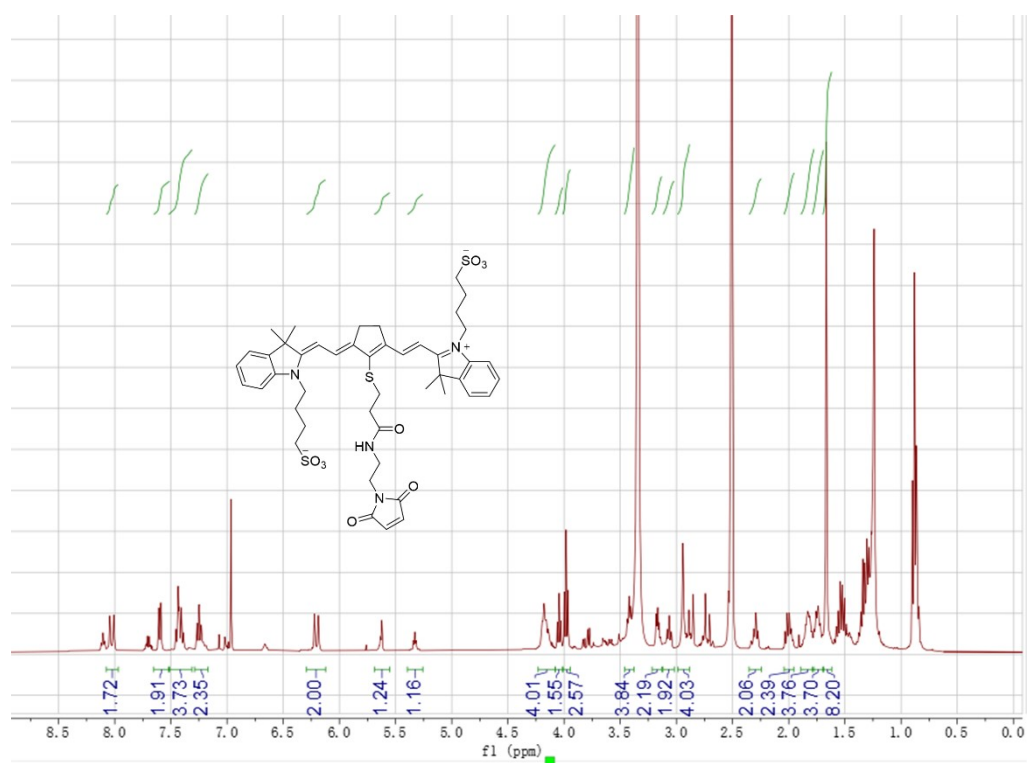

**Figure S3.**  $^1\text{H}$  NMR spectrum of IR806-Mal. DMSO- $d_6$  was used as the solvent.

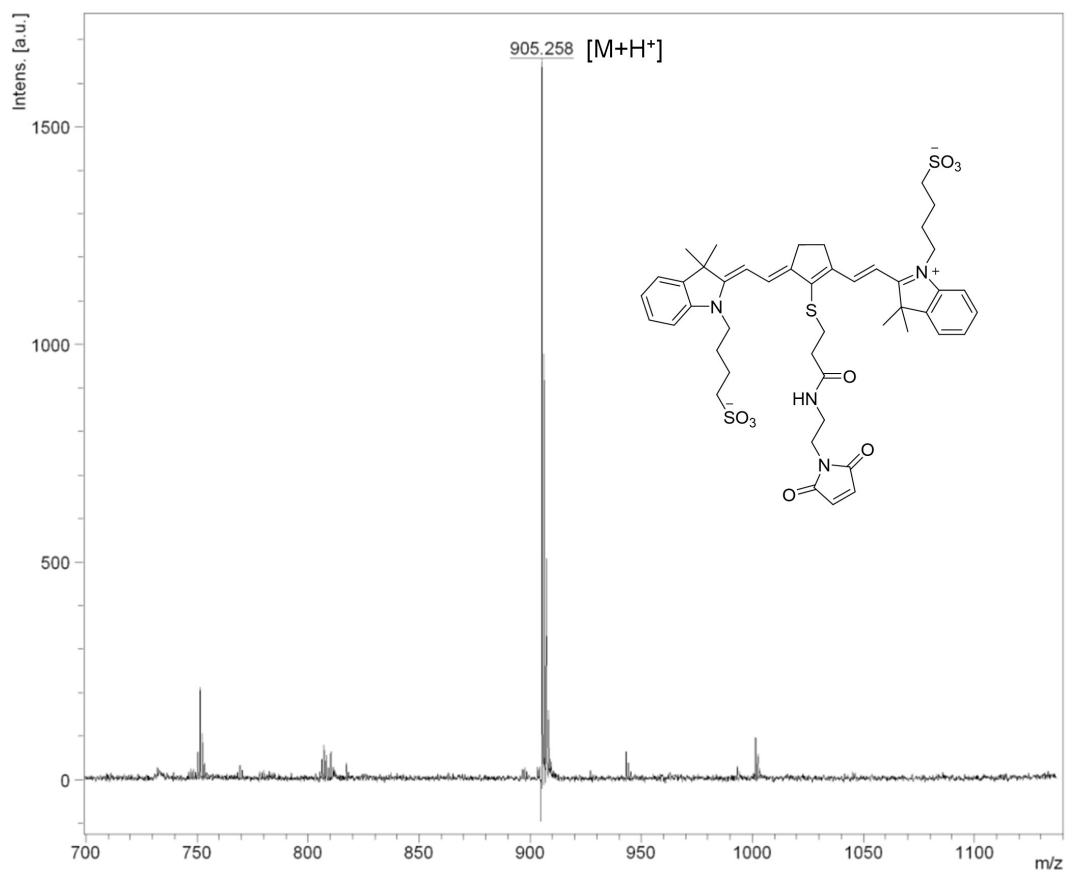

**Figure S4.** MALDI-TOF MS of IR806-Mal.

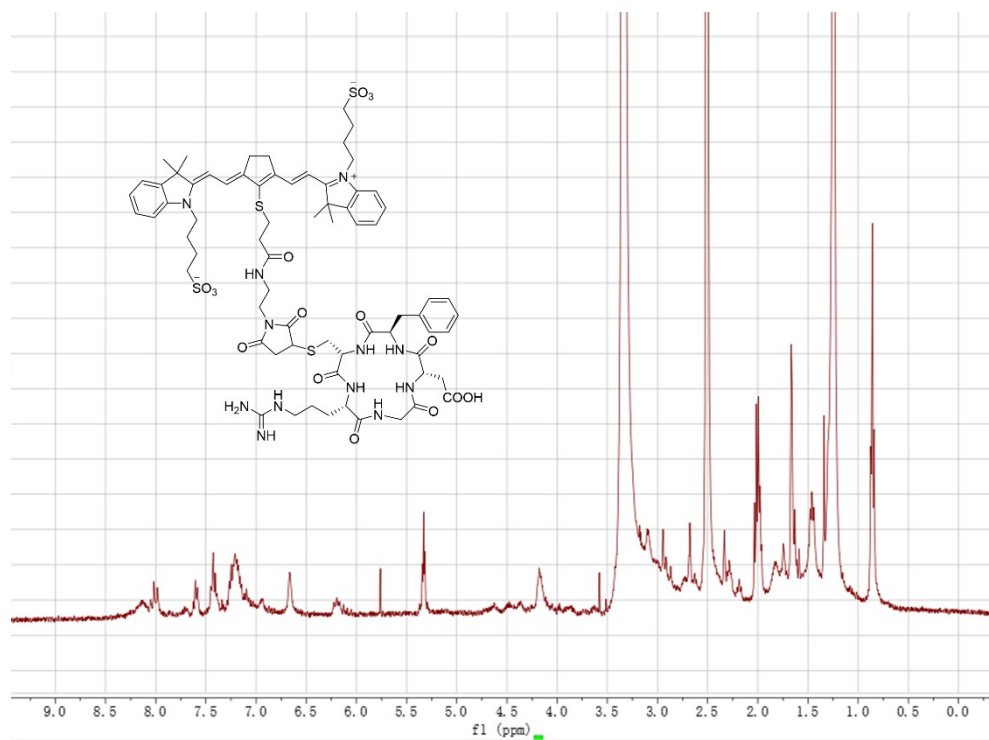

**Figure S5.**  $^1\text{H}$  NMR spectrum of IR806-RGD. DMSO- $d_6$  was used as the solvent.

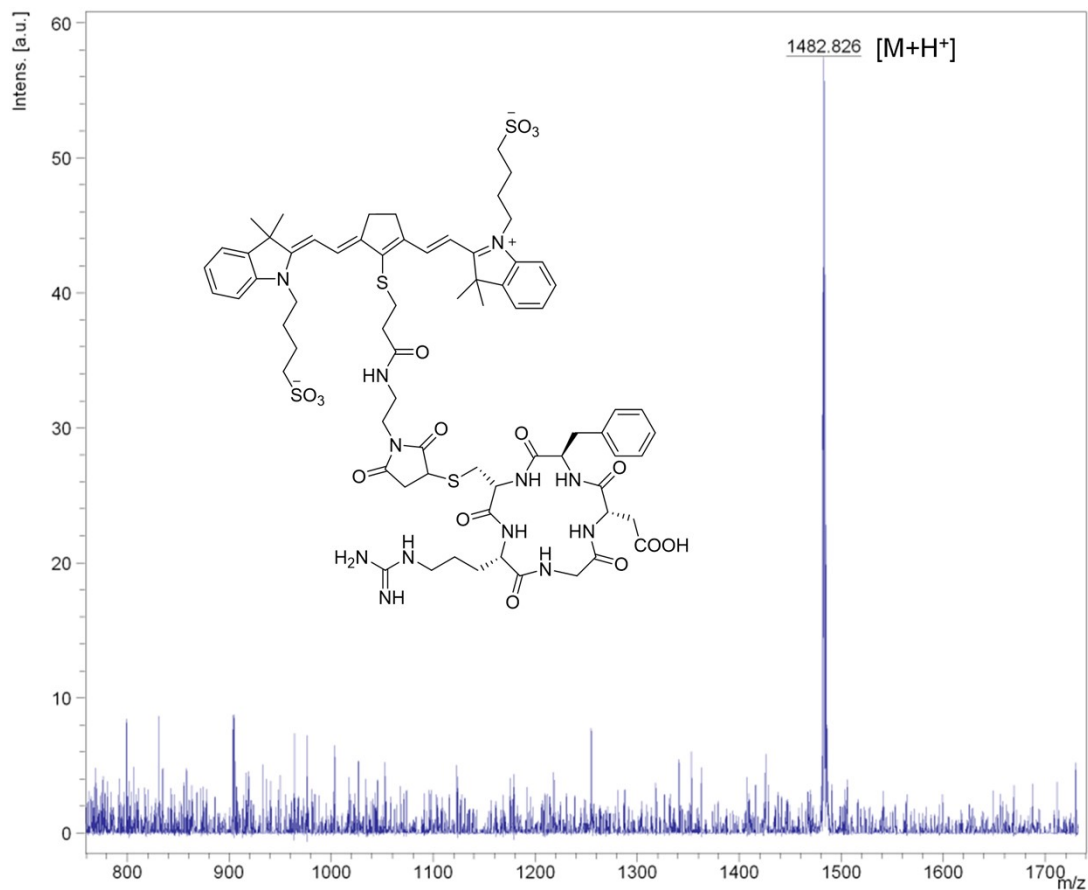

**Figure S6.** MALDI-TOF MS of IR806-RGD.

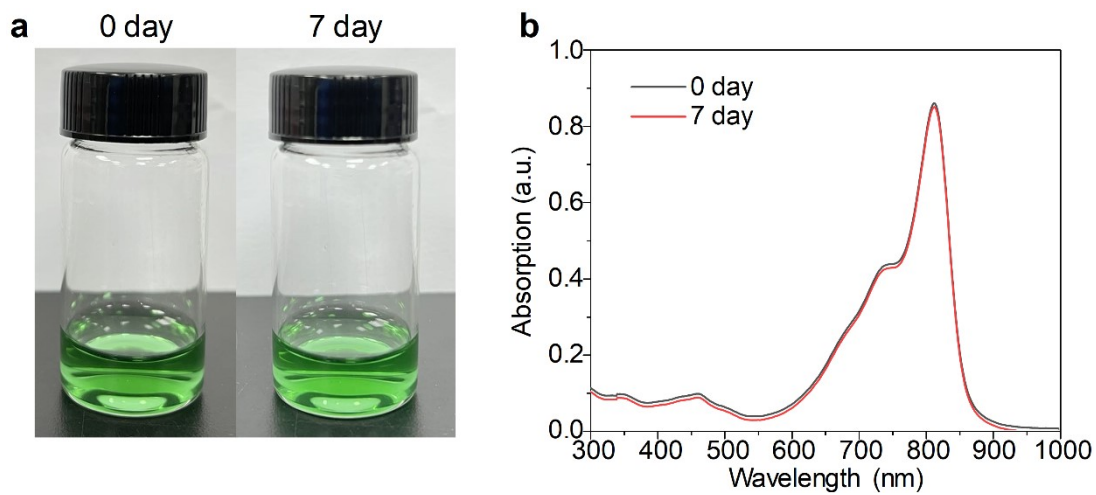

**Figure S7.** (a) Images of PBS solution (pH 7.4) of IR806-RGD before and after 7 day's storage under 4 °C. (b) Absorption spectra of IR806-RGD solution before and after 7 day's storage under 4 °C.

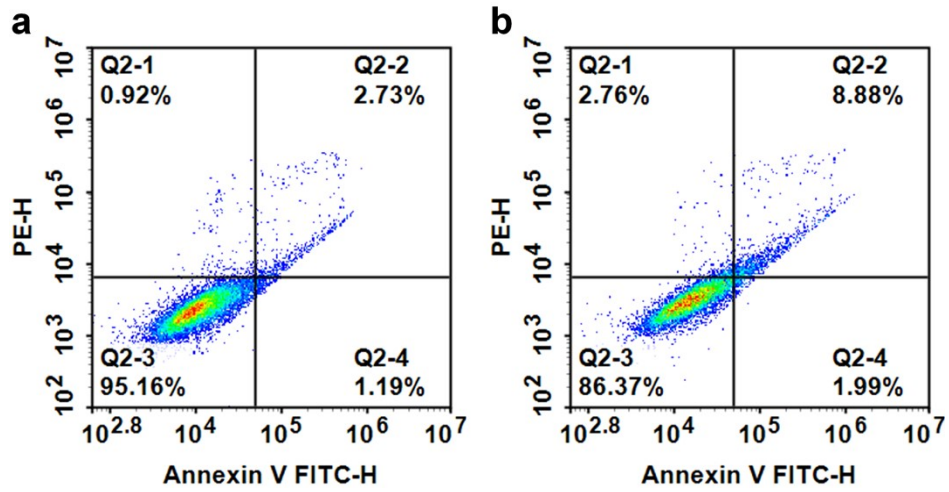

**Figure S8.** Flow cytometry analysis for viability of 4T1 cells treated with PBS (a) or IR806-RGD (b).

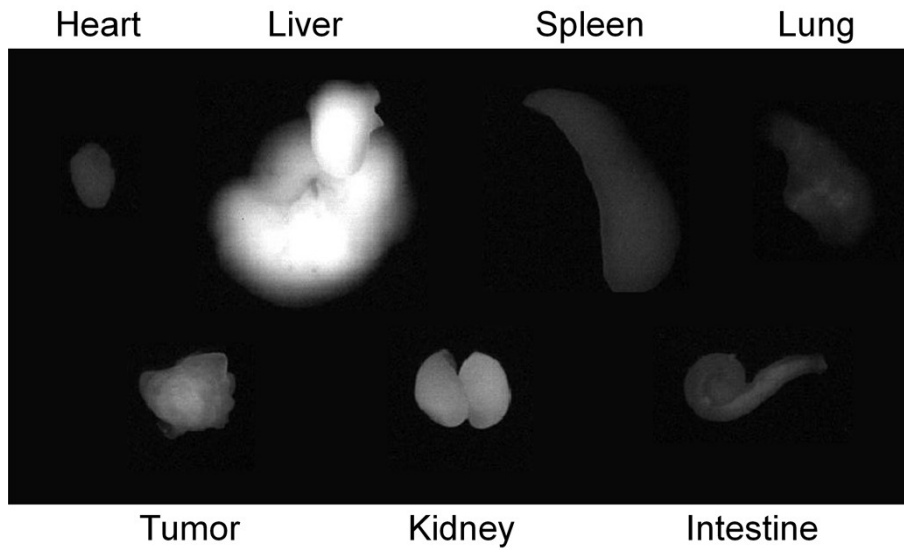

**Figure S9.** Ex vivo NIR-II fluorescence image of major organs and tumor resected from IR806-injected mice at  $t = 24$  h post-injection.

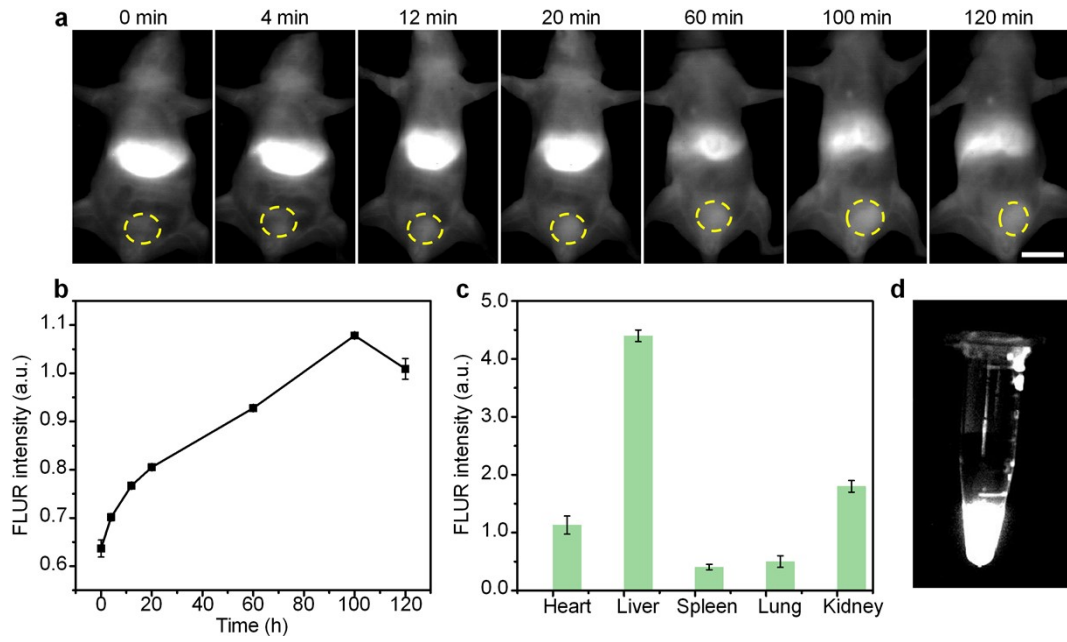

**Figure S10.** (a) NIR-II fluorescence images of mice i.v. injected with IR806-RGD at different time points. The yellow circles indicate the location of bladder. The scale bar represents 5 mm. The excitation wavelength was 808 nm with a 980 nm long-pass filter. The exposure time was 50 ms, and the laser power was 1.5 W/cm<sup>2</sup>. (b) NIR-II fluorescence intensities of bladder as a function of post-injection time. (c) NIR-II fluorescence intensities of major organs resected from mice at t = 120 min post-injection. (d) NIR-II fluorescence image of urine collected from IR806-RGD-injected mice.

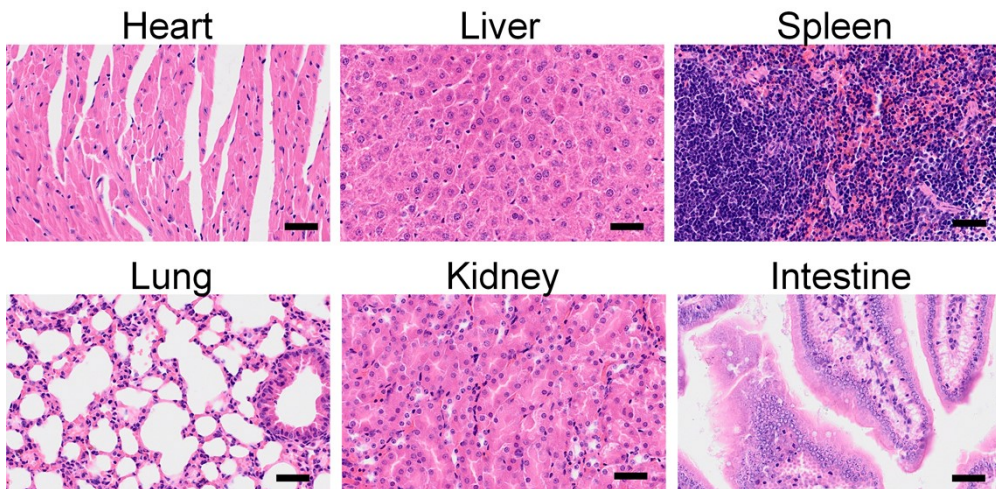

**Figure S11.** H&E staining of major organs collected from IR806-RGD injected mice.

The scale bars represent 50  $\mu\text{m}$ .
